# Supplementary material for: Nanoscale deposition of metal–organic framework films on polymer nanosheets
Source: Royal Society of Chemistry journal article supplement (doi:10.1039/c6ra17997e), 2016-01-01
Supplement: c6ra17997e1.pdf [file c6ra17997e1.pdf]

ELECTRONIC SUPPLEMENTARY INFORMATION

# Nanoscale Deposition of Metal Organic Framework Films on Polymer Nanosheets

*Hiroaki Ohara, Shunsuke Yamamoto, Tsunenobu Onodera, Hitoshi Kasai, Hidetoshi Oikawa,*

*Tokuji Miyashita, and Masaya Mitsuishi*

Institute of Multidisciplinary Research for Advanced Materials (IMRAM), Tohoku

University,

2-1-1 Katahira, Aoba-ku, Sendai 980-8577, Japan

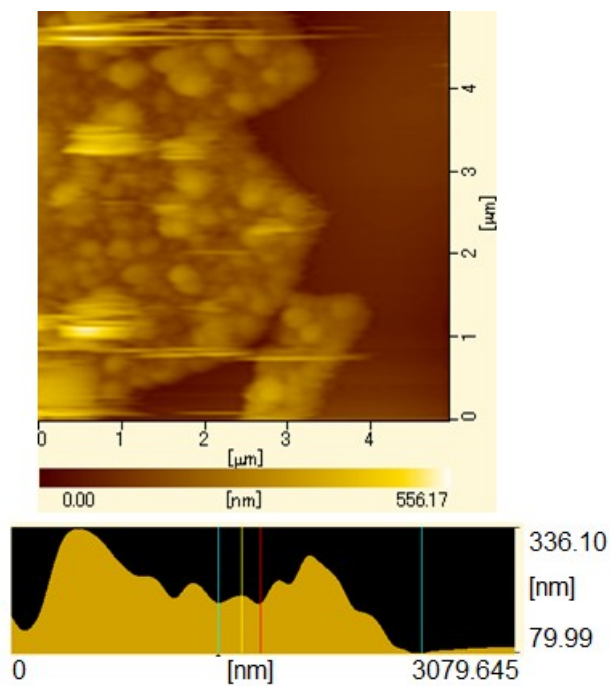

**Figure S1** (Top) Surface topography image of pDDA(9)/HKUST-1(40). (Bottom) Cross-section profile of pDDA(9)/HKUST-1(40).

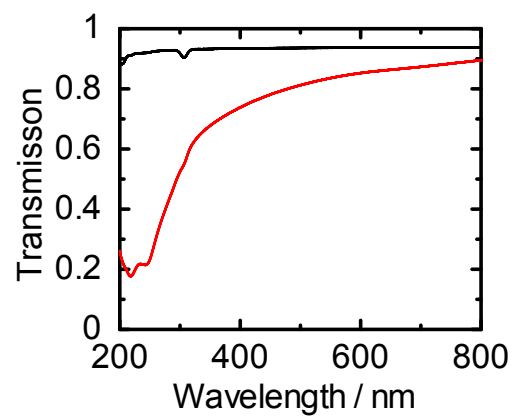

**Figure S2** UV-vis transmission spectra of pDDA nanosheets (9)/HKUST-1(10) deposited on a CaF<sub>2</sub> plate (red) and bare CaF<sub>2</sub> plate (black).
